# Supplementary material
Source: HighWire-hosted journal article supplement (https://erj.ersjournals.com/content/59/4/2102971)
Supplement: inline-supplementary-material-1 [file inline-supplementary-material-1.pdf]

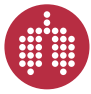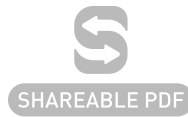

# Targeted therapy for pulmonary alveolar proteinosis: the time is now

Francesco Bonella <sup>1</sup> and Raphael Borie <sup>2,3</sup>

<sup>1</sup>Center for Interstitial and Rare Lung Diseases, Pneumology Dept, Ruhrlandklinik, University Hospital, University of Essen, European Reference Network (ERN)-LUNG, ILD Core Network, Essen, Germany. <sup>2</sup>Université de Paris, Inserm, U1152, laboratoire d'excellence INFLAMEX, Paris, France. <sup>3</sup>Hôpital Bichat, APHP, Service de Pneumologie A, Centre constitutif du centre de référence des Maladies Pulmonaires Rares, FHU APOLLO, Paris, France.

Corresponding author: Francesco Bonella ([Francesco.Bonella@ruhrlandklinik.uk-essen.de](mailto:Francesco.Bonella@ruhrlandklinik.uk-essen.de))

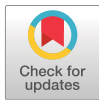

Shareable abstract (@ERSpublications)

**Gene therapy and impaired pathway correction are promising treatments for selected patients with pulmonary alveolar proteinosis syndrome** <https://bit.ly/3d9hjdS>

**Cite this article as:** Bonella F, Borie R. Targeted therapy for pulmonary alveolar proteinosis: the time is now. *Eur Respir J* 2022; 59: 2102971 [DOI: 10.1183/13993003.02971-2021].

This single-page version can be shared freely online.

Copyright ©The authors 2022.  
For reproduction rights and  
permissions contact  
[permissions@ersnet.org](mailto:permissions@ersnet.org)

Received: 19 Nov 2021  
Accepted: 24 Nov 2021

Pulmonary alveolar proteinosis (PAP) is a rare syndrome with a complex pathogenesis leading, at the end, to accumulation of surfactant phospholipids and lipoproteins in the alveoli, and causing progressive respiratory insufficiency [1]. Alongside the most common autoimmune form, affecting more than 90% of patients and characterised by the presence of granulocyte-macrophage colony-stimulating factor (GM-CSF) autoantibodies, there are severe forms associated with genetic mutations, which are usually diagnosed in children. The landscape of genetic mutations underlying PAP is rapidly evolving and advances in this field from the past decade are impressive [2, 3]. In terms of frequency, the most common mutations, associated with primary hereditary PAP, affect genes coding for the a- and b-subunit of GM-CSF receptor (CSF2RA and CSF2RB), followed by surfactant (SFTPB, SFTPC, SFTPA1 and SFTPA2), ABCA3 and NKX2.1 gene mutations; PAP syndrome occurs sporadically in the latter two. Further, GATA-2 mutations, associated with a genetic immunodeficiency syndrome (MonoMAC) [4–6], SLC7A7, MARS, FARSB and NPC 2 gene mutations (causing lysinuric protein intolerance, methionine deficit, phenylalanine-tRNA synthetase deficit and Niemann–Pick disease, respectively) [2], and telomerase reverse transcriptase (TERT) mutations [7, 8] can also be revealed by PAP.
